# Supplementary material
Source: PubMed Central journal article supplement (PMC3754749)
Supplement: JB.00383-13_zjb999092791so1.pdf [file JB.00383-13_zjb999092791so1.pdf]

Supplement to

**Acetylation of the Response Regulator RcsB  
Controls Transcription from a Small RNA Promoter**

**Linda I. Hu<sup>1</sup>, Bui Khanh Chi<sup>2</sup>, Misty L. Kuhn<sup>3</sup>, Ekaterina V. Filippova<sup>3</sup>, Arti J. Walker-Peddakotla<sup>1</sup>, Katrin Bäsell<sup>2</sup>, Dörte Becher<sup>2</sup>, Wayne F. Anderson<sup>3</sup>, Haike Antelmann<sup>2</sup>, and  
Alan J. Wolfe<sup>1#</sup>**

<sup>1</sup>Department of Microbiology and Immunology Loyola University Chicago Stritch School of Medicine 2160 S. First Ave. Bldg. 105 Maywood, IL 60153, USA

<sup>2</sup>Institute for Microbiology Ernst-Moritz-Arndt-University of Greifswald, F.-L.-Jahn-Str. 15, D-17487 Greifswald, Germany

<sup>3</sup>Center for Structural Genomics of Infectious Diseases Northwestern University, Feinberg School of Medicine, Department of Molecular Pharmacology and Biological Chemistry, Chicago, IL 60611, USA

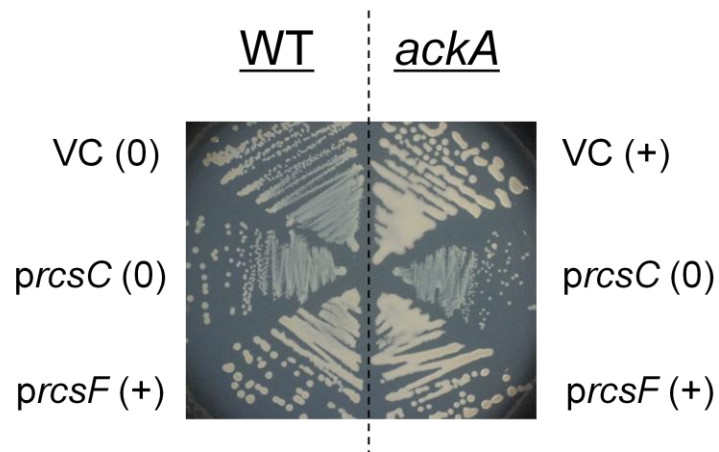

**Figure S1. RcsC and RcsF overexpression can manipulate the mucoid phenotype on TB.**

AJW678 WT or the isogenic *ackA* mutant transformed with the vector control (pTrc99a), an RcsC overexpression plasmid (pPSG980), or an RcsF overexpression plasmid (pMH300) were grown on TB plates supplemented with ampicillin and 50  $\mu$ M IPTG at 22°C for 2 days. The image was taken on a light box. “+” indicates mucoidy and “0” indicates no observable mucoidy.

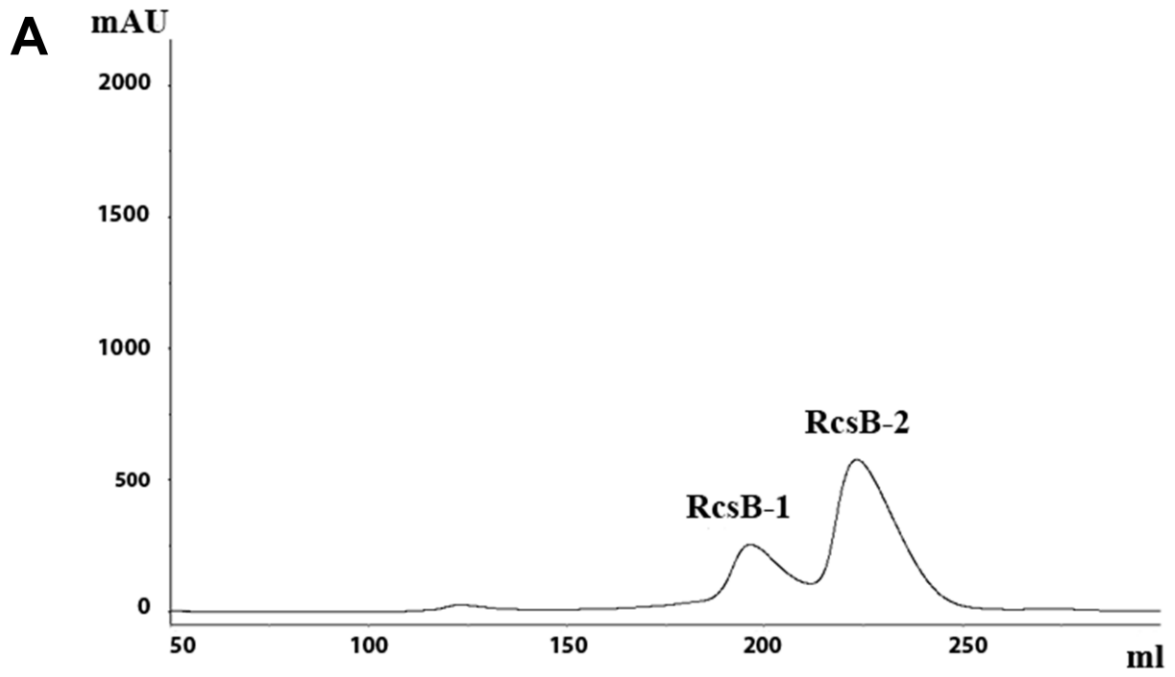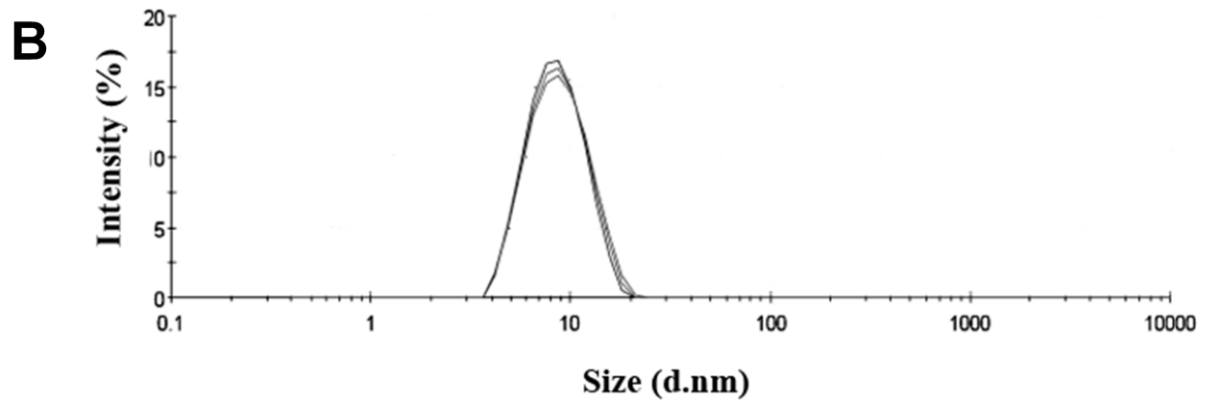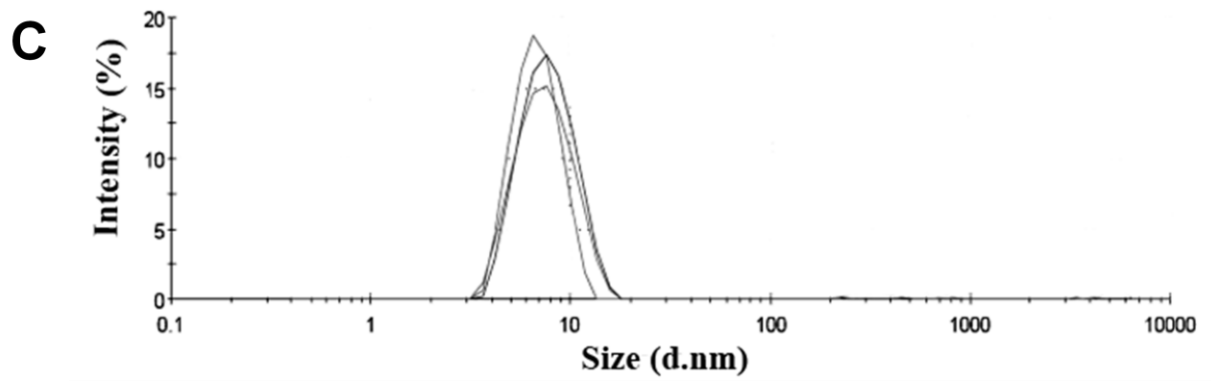

**Figure S2. Gel filtration and dynamic light scattering analysis of RcsB.**

A) Elution profile at 280 nm of the purified RcsB protein in 10 mM Bis-Tris, 500 mM Sodium Chloride, pH 8.3. Flow rate 3.2 ml/min on a gel filtration column (Superdex) attached to FPLC system.

B) Distribution of scattering intensity for RcsB peak 1 (RcsB-1) at ~ 1.0 mg/ml. The estimated molecular weight of RcsB-1 is 110 kDa (tetramer).

C) Distribution of scattering intensity for RcsB peak 2 (RcsB-2) at ~ 1.0 mg/ml. The estimated molecular weight of RcsB-2 is 67 kDa (dimer).

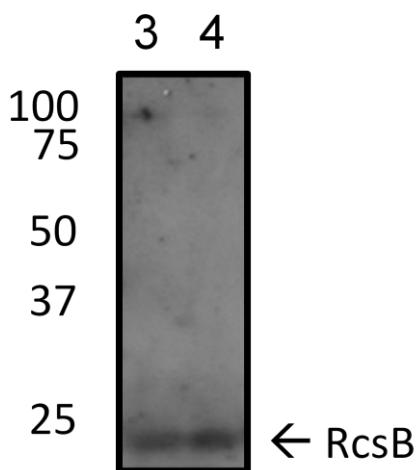

**Figure S3. Purified RcsB acetylation is detectable by anti-acetyl lysine Western immunoblot analysis.**

A longer exposure time (5 minutes) of the blot from Figure 6A, showing lanes 3 and 4, which contains purified RcsB peak 1 and peak 2, respectively.

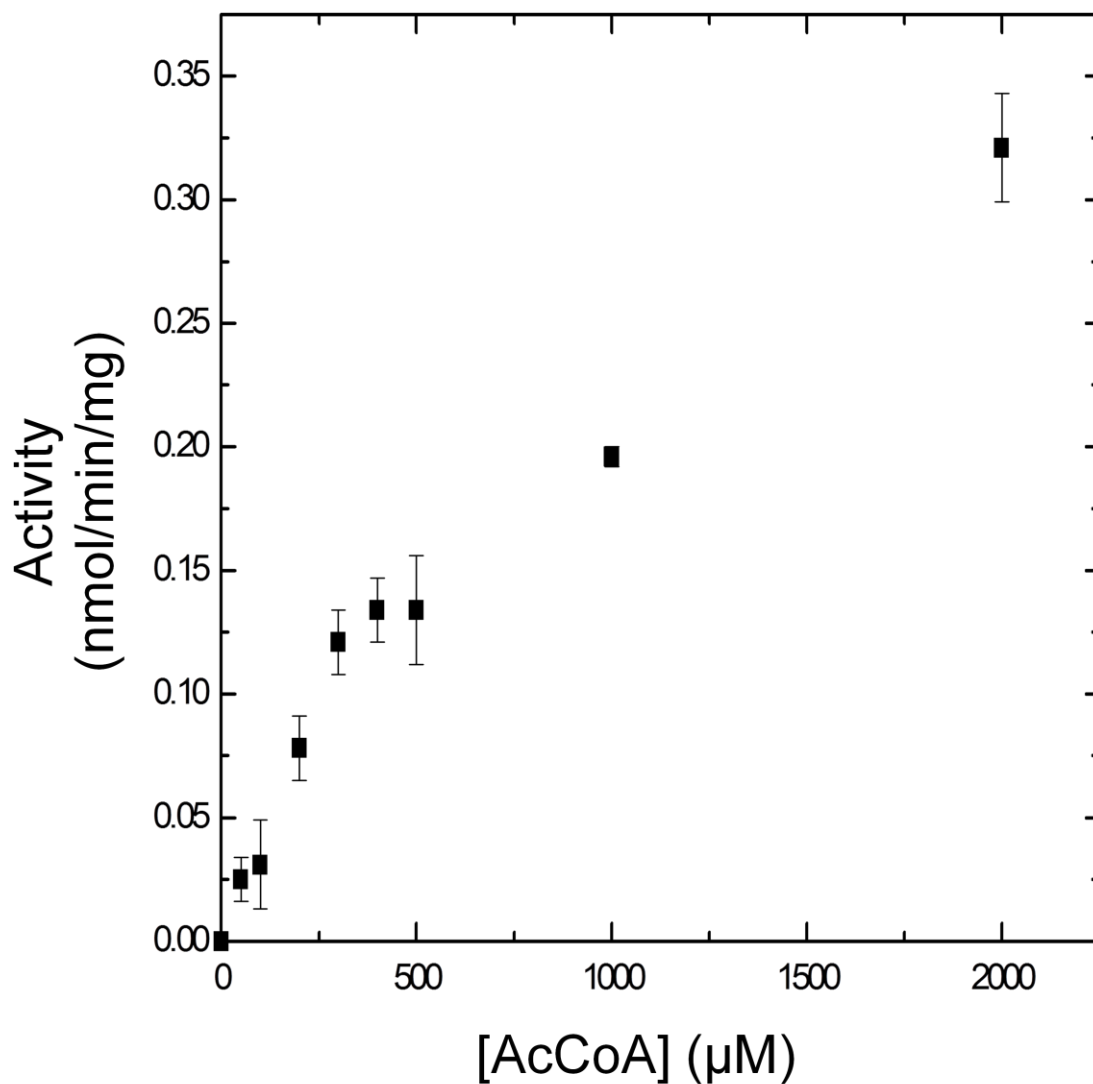

**Figure S4. Concentration-dependent hydrolysis of AcCoA by YfiQ**

Activity of YfiQ versus increasing concentrations of AcCoA. Reactions were performed at 25 degrees Celsius for one hour in a 50  $\mu$ l reaction volume at 0-2 mM concentrations of AcCoA.

YfiQ (0.02 mM) was used to initiate the reaction. Activity (nmol/min/mg) is the average of two separate trials.
